# Supplementary material for: A 10-hour within-participant magnetoencephalography narrative dataset to test models of language comprehension
Source: PubMed Central journal article supplement (PMC9177538; doi:10.1038/s41597-022-01382-7), 2022-06-08
Supplement: 41597_2022_1382_MOESM2_ESM.pdf [file 41597_2022_1382_MOESM2_ESM.pdf]

A 10-hour within-participant  
magnetoencephalography narrative dataset to test  
models of naturalistic language comprehension:  
Supplementary information

Table 1: Stimulus information

| session | run | audio_filename | duration | txt_filename |
|---------|-----|----------------|----------|--------------|
| ses-001 | 1   | 01_1.wav       | 07:56    | 01_1.txt     |
| ses-001 | 2   | 01_2.wav       | 05:41    | 01_2.txt     |
| ses-001 | 3   | 01_3.wav       | 09:50    | 01_3.txt     |
| ses-001 | 4   | 01_4.wav       | 08:27    | 01_4.txt     |
| ses-001 | 5   | 01_5.wav       | 07:42    | 01_5.txt     |
| ses-001 | 6   | 01_6.wav       | 07:49    | 01_6.txt     |
| ses-001 | 7   | 01_7.wav       | 07:22    | 01_7.txt     |
| ses-002 | 1   | 02_1.wav       | 07:34    | 02_1.txt     |
| ses-002 | 2   | 02_2.wav       | 08:52    | 02_2.txt     |
| ses-002 | 3   | 02_3.wav       | 09:03    | 02_3.txt     |
| ses-002 | 4   | 02_4.wav       | 07:44    | 02_4.txt     |
| ses-002 | 5   | 02_5.wav       | 07:25    | 02_5.txt     |
| ses-002 | 6   | 02_6.wav       | 09:04    | 02_6.txt     |
| ses-002 | 7   | 02_7.wav       | 08:51    | 02_7.txt     |
| ses-003 | 1   | 03_1.wav       | 06:15    | 03_1.txt     |
| ses-003 | 2   | 03_2.wav       | 04:59    | 03_2.txt     |
| ses-003 | 3   | 03_3.wav       | 10:27    | 03_3.txt     |
| ses-003 | 4   | 03_4.wav       | 07:26    | 03_4.txt     |
| ses-003 | 5   | 03_5.wav       | 05:46    | 03_5.txt     |
| ses-003 | 6   | 03_6.wav       | 07:42    | 03_6.txt     |
| ses-004 | 1   | 04_1.wav       | 07:43    | 04_1.txt     |

Continued on next page

Table 1: Stimulus information

| session | run | audio_filename | duration | txt_filename |
|---------|-----|----------------|----------|--------------|
| ses-004 | 2   | 04_2.wav       | 05:27    | 04_2.txt     |
| ses-004 | 3   | 04_3.wav       | 06:55    | 04_3.txt     |
| ses-004 | 4   | 04_4.wav       | 06:54    | 04_4.txt     |
| ses-004 | 5   | 04_5.wav       | 09:34    | 04_5.txt     |
| ses-004 | 6   | 04_6.wav       | 07:29    | 04_6.txt     |
| ses-004 | 7   | 04_7.wav       | 08:37    | 04_7.txt     |
| ses-004 | 8   | 04_8.wav       | 07:58    | 04_8.txt     |
| ses-005 | 1   | 05_1.wav       | 06:56    | 05_1.txt     |
| ses-005 | 2   | 05_2.wav       | 09:05    | 05_2.txt     |
| ses-005 | 3   | 05_3.wav       | 05:48    | 05_3.txt     |
| ses-005 | 4   | 05_4.wav       | 06:34    | 05_4.txt     |
| ses-005 | 5   | 05_5.wav       | 11:03    | 05_5.txt     |
| ses-005 | 6   | 05_6.wav       | 08:09    | 05_6.txt     |
| ses-006 | 1   | 06_1.wav       | 10:25    | 06_1.txt     |
| ses-006 | 2   | 06_2.wav       | 05:47    | 06_2.txt     |
| ses-006 | 3   | 06_3.wav       | 09:16    | 06_3.txt     |
| ses-006 | 4   | 06_4.wav       | 05:43    | 06_4.txt     |
| ses-006 | 5   | 06_5.wav       | 08:36    | 06_5.txt     |
| ses-006 | 6   | 06_6.wav       | 08:08    | 06_6.txt     |
| ses-006 | 7   | 06_7.wav       | 09:37    | 06_7.txt     |
| ses-007 | 1   | 07_1.wav       | 07:01    | 07_1.txt     |
| ses-007 | 2   | 07_2.wav       | 09:51    | 07_2.txt     |
| ses-007 | 3   | 07_3.wav       | 09:41    | 07_3.txt     |
| ses-007 | 4   | 07_4.wav       | 08:28    | 07_4.txt     |
| ses-007 | 5   | 07_5.wav       | 06:51    | 07_5.txt     |
| ses-007 | 6   | 07_6.wav       | 06:53    | 07_6.txt     |
| ses-008 | 1   | 08_1.wav       | 07:23    | 08_1.txt     |
| ses-008 | 2   | 08_2.wav       | 08:31    | 08_2.txt     |
| ses-008 | 3   | 08_3.wav       | 08:46    | 08_3.txt     |
| ses-008 | 4   | 08_4.wav       | 06:21    | 08_4.txt     |
| ses-008 | 5   | 08_5.wav       | 08:51    | 08_5.txt     |
| ses-008 | 6   | 08_6.wav       | 08:14    | 08_6.txt     |
| ses-008 | 7   | 08_7.wav       | 12:00    | 08_7.txt     |
| ses-009 | 1   | 09_1.wav       | 08:35    | 09_1.txt     |

Continued on next page

Table 1: Stimulus information

| session | run | audio_filename | duration | txt_filename |
|---------|-----|----------------|----------|--------------|
| ses-009 | 2   | 09_2.wav       | 11:14    | 09_2.txt     |
| ses-009 | 3   | 09_3.wav       | 08:21    | 09_3.txt     |
| ses-009 | 4   | 09_4.wav       | 06:41    | 09_4.txt     |
| ses-009 | 5   | 09_5.wav       | 05:53    | 09_5.txt     |
| ses-009 | 6   | 09_6.wav       | 08:45    | 09_6.txt     |
| ses-010 | 1   | 10_1.wav       | 09:31    | 10_1.txt     |
| ses-010 | 2   | 10_2.wav       | 06:29    | 10_2.txt     |
| ses-010 | 3   | 10_3.wav       | 10:28    | 10_3.txt     |
| ses-010 | 4   | 10_4.wav       | 07:25    | 10_4.txt     |
| ses-010 | 5   | 10_5.wav       | 10:59    | 10_5.txt     |
| ses-010 | 6   | 10_6.wav       | 05:54    | 10_6.txt     |
